# Supplementary material for: Behavior of two Tannerella forsythia strains and their cell surface mutants in multispecies oral biofilms
Source: PubMed Central journal article supplement (PMC5600126; doi:10.1111/omi.12182), 2017-05-22
Supplement: OMI-32-404-s001.pdf [file OMI-32-404-s001.pdf]

Supporting Information

**Behavior of two *Tannerella forsythia* strains and their cell surface mutants in multispecies oral biofilms**

**Susanne Bloch, Thomas Thurnheer, Yukitaka Murakami, Georgios N. Belibasakis,  
Christina Schäffer**

## SUPPORTING MATERIAL AND METHODS

### Planktonic growth of *T. forsythia*

In order to evaluate the growth kinetics of both *T. forsythia* ATCC 43037 and UB4 wild-type strains as well as their respective mutants, bacteria were grown for 3 days in BHI supplemented with *N*-acetylmuramic acid, horse serum and 50 µg/ml gentamycin. From these cultures, 10 ml of fresh BHI was inoculated at a final OD<sub>600</sub> of 0,05. The OD<sub>600</sub> was measured in 24 hour intervals for 8 d <sup>[1]</sup>. Growth curves were obtained from three individual experiments with two technical replicates each.

### Coaggregation assay

Coaggregation assays were performed according to Shimotahira *et al.* <sup>[1]</sup>. In brief, *T. forsythia* wild-type and mutant strains were grown in BHI supplemented with *N*-acetylmuramic acid, horse serum and gentamycin. *Porphyromonas gingivalis* (OMZ925) was cultivated in BHI (without supplements), *C. rectus* OMZ388 in mFUM supplemented with 0.1% NaFF. All strains were harvested by centrifugation and resuspended in coaggregation buffer (1 mM CaCl<sub>2</sub>, 1 mM MgCl<sub>2</sub>, 150 mM NaCl, and Tris-HCl [pH 8.0]). The suspensions were adjusted to an OD<sub>600</sub> of 0.5. Coaggregation partner strains were mixed in a 1:1 ratio in a disposable cuvette. Additionally, for each strain the autoaggregation was determined by measuring single bacterial cells only. Suspensions were incubated at room temperature and were measured at 15-min intervals using a spectrophotometer. Decreases in absorbance indicated cell aggregates precipitating to the bottom of the cuvette. The percentage of aggregation (AI) was calculated as: 
$$AI = \frac{(\text{initial OD}_{600} - \text{post incubation OD}_{600})}{\text{initial OD}_{600}} \times 100$$
. Data represent mean values ± SD of five independent experiments with three replicates each for coaggregation *P. gingivalis* and four independent experiments with three replicates each for coaggregation with *C. rectus*. Statistical analysis was performed using the unpaired Student's t-Test. Asterisks indicate significant differences (\*, P < 0.05).

## SUPPORTING TABLES

**Table S1.** Doubling times of *T. forsythia* wild-type and mutant strains used in this study. Doubling times (mean values  $\pm$ SD) are shown. Significant differences between strains were determined by the unpaired Student's t-Test ( $P \leq 0.05$ ); \*significantly higher versus *T. forsythia* ATCC 43037 wild-type and complemented strain  $\Delta$ pseC<sub>comp</sub>, <sup>¶</sup> significantly higher versus *T. forsythia* ATCC 43037 wild-type, # significantly higher versus *T. forsythia* ATCC 43037  $\Delta$ wecC.

| <i>T. forsythia</i> strain              | Doubling time (h) $\pm$ SD | Significance |
|-----------------------------------------|----------------------------|--------------|
| ATCC43037 WT                            | 14.41 $\pm$ 1.41           |              |
| ATCC43037 $\Delta$ pseC                 | 25.59 $\pm$ 9.29           | *#           |
| ATCC43037 $\Delta$ wecC                 | 17.80 $\pm$ 2.38           | ¶            |
| ATCC43037 $\Delta$ tfsAB                | 20.74 $\pm$ 5.76           | *            |
| ATCC43037 $\Delta$ pseC <sub>comp</sub> | 14.99 $\pm$ 3.64           |              |
| UB4 WT                                  | 16.75 $\pm$ 9.58           |              |
| UB4 $\Delta$ legC                       | 19.07 $\pm$ 8.40           |              |
| UB4 $\Delta$ legC <sub>comp</sub>       | 12.28 $\pm$ 3.75           |              |

## SUPPORTING FIGURES

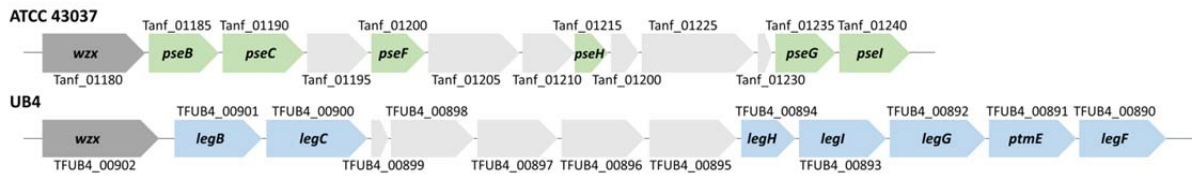

**Figure S1.** Nonulosonic acid biosynthesis locus of *T. forsythia* ATCC 43037 and *T. forsythia* UB4 wild-type strains. Pse biosynthesis genes (*pseB*, *pseC*, *pseH*, *pseG*, *pseI* and *pseF*) present in the type strain ATCC 43037 are shown in red. Corresponding genes for Leg biosynthesis (*legB*, *legC*, *legH*, *legI*, *legG*, *legF* and a gene encoding a predicted nucleotidyl transferase (*ptmE*) are shown in green for the UB4 strain <sup>[2]</sup>. NCBI locus tags are shown for each gene.

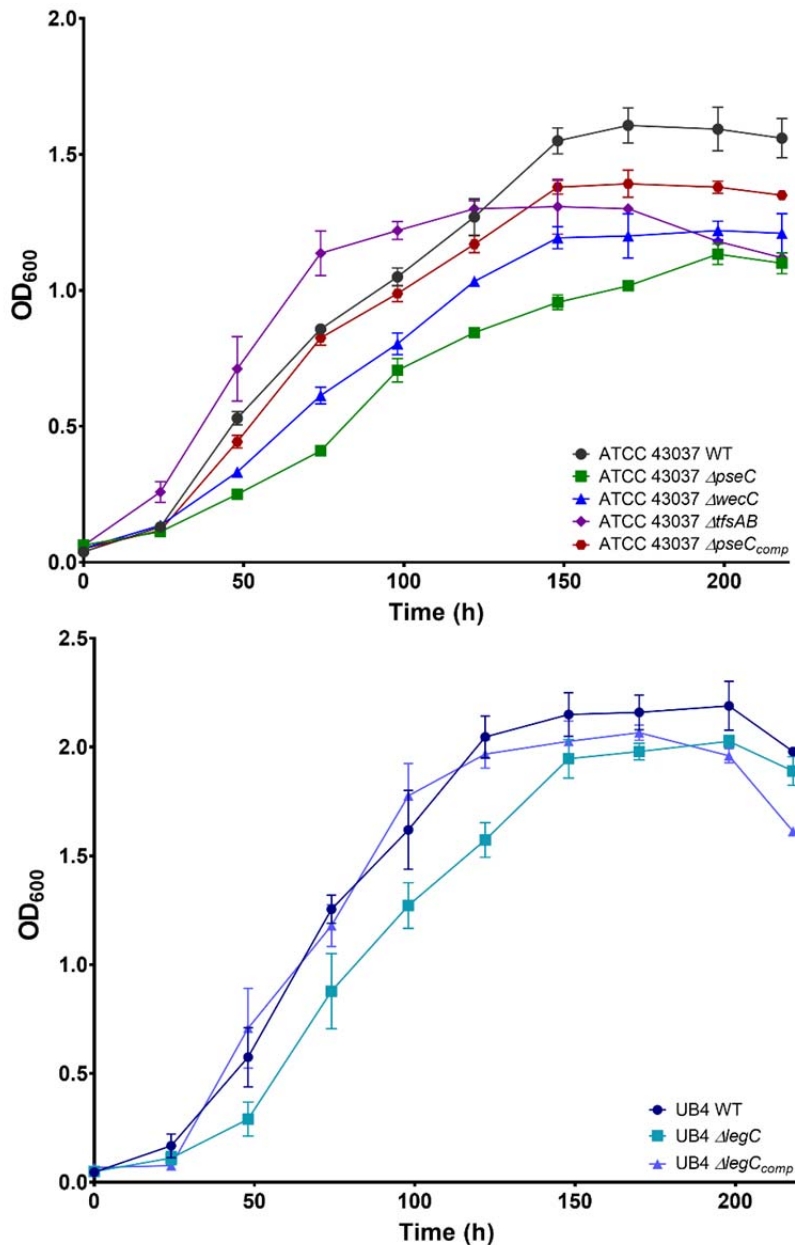

**Figure S2.** Growth curves of *T. forsythia* wild-type strains and mutants included in this study. Growth of *T. forsythia* strains was monitored by measuring the OD<sub>600</sub> at 24-hour intervals in three independent experiments with two technical replicates per strain. Data are presented as mean  $\pm$  SEM. **(A)** Growth curves of ATCC 43037 wild-type, ATCC 43037  $\Delta pseC$ ,  $\Delta wecC$ ,  $\Delta tfsAB$  mutants, and complemented strain  $\Delta pseC_{comp}$  and **(B)** *Tannerella forsythia* UB4 wild-type, UB4  $\Delta legC$  mutant and complemented strain  $\Delta legC_{comp}$ .

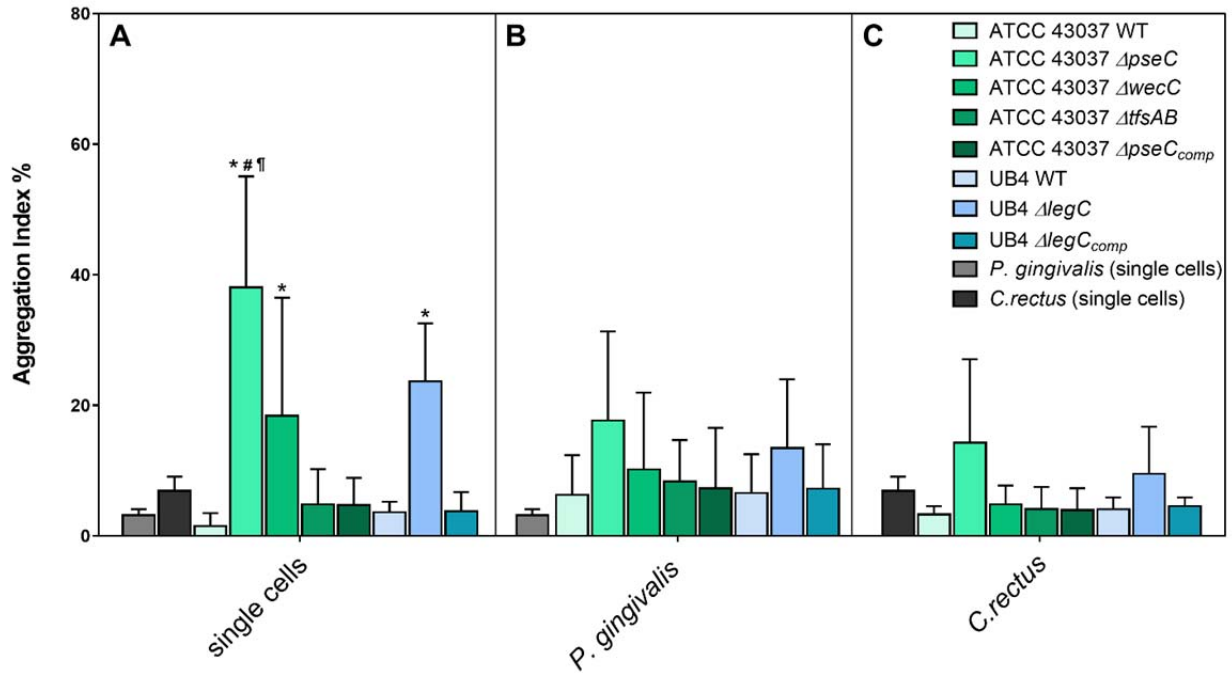

**Figure S3.** Aggregation of *T. forsythia* wild-type strains and mutants with *P. gingivalis* and *C. rectus*. Each *T. forsythia* strain was mixed with its co-aggregation partner in a 1:1-ratio and the OD<sub>600</sub> of the suspension was measured in 15-minute intervals. For each strain,

the autoaggregation (AI) was calculated as:  $AI = \frac{(\text{initial OD}_{600} - \text{post incubation OD}_{600})}{\text{initial OD}_{600}} \times 100$ .

The coaggregation rate (CR) was determined as:  $CR = \frac{(AI_x + AI_y)}{2} - \frac{AI_{x+y}}{(AI_x + AI_y)/2}$ , where  $AI_x$  and  $AI_y$  represent the aggregation of one species alone and  $AI_{x+y}$  represents the aggregation of the mixture of *T. forsythia* with *P. gingivalis* or *C. rectus*, respectively<sup>[3]</sup>. Mean values  $\pm$ SD of five independent experiments for coaggregation with *P. gingivalis* and four independent experiments for coaggregation with *C. rectus* are shown. Statistical significance was tested by ANOVA (Tukey's post-hoc test for multiple comparisons,  $P \leq 0.05$ ) using GraphPad Prism version 7.00 for Windows (GraphPad Software, La Jolla California USA); \* significantly higher versus parental wild-type and complemented strain, ¶ significantly higher versus *T. forsythia* ATCC 43037  $\Delta tfsAB$ , # significantly higher versus *T. forsythia* ATCC 43037  $\Delta wecC$ .

## References

1. Shimotahira, N, Oogai, Y, Kawada-Matsuo, M, et al. The surface layer of *Tannerella forsythia* contributes to serum resistance and oral bacterial coaggregation. *Infect Immun*. 2013;81(4):1198-1206.
2. Friedrich, V, Janesch, B, Windwarder, M, et al. *Tannerella forsythia* strains display different cell-surface nonulosonic acids: biosynthetic pathway characterization and first insight into biological implications. *Glycobiology*. 2017;doi:10.1093/glycob/cww129.
3. Cheng, Z, Meng, X, Wang, H, Chen, M, Li, M. Isolation and characterization of broad spectrum coaggregating bacteria from different water systems for potential use in bioaugmentation. *PLoS One*. 2014;9(4):e94220.
